# Supplementary material
Source: MDPI journal article supplement (https://www.mdpi.com/1424-8220/11/9/8685)
Supplement: s1 [file s1]

Correction

**Correction: Zarzo, M. *et al.* Long-Term Monitoring of Fresco Paintings in the Cathedral of Valencia (Spain) through Humidity and Temperature Sensors in Various Locations for Preventive Conservation. *Sensors* 2011, 11, 8685–8710**

Manuel Zarzo <sup>1</sup>, Angel Fernández-Navajas <sup>2</sup> and Fernando-Juan García-Diego <sup>2,\*</sup>

<sup>1</sup> Department of Applied Statistics, Operations Research and Quality, Universidad Politécnica de Valencia, Camino de Vera s/n, 46022 Valencia, Spain; E-Mail: mazarcas@eio.upv.es

<sup>2</sup> Department of Applied Physics (UD Agriculture Engineering), Universidad Politécnica de Valencia, Camino de Vera s/n, 46022 Valencia, Spain; E-Mail: afnavajas@fis.upv.es

\* Author to whom correspondence should be addressed; E-Mail: ffgarcid@upvnet.upv.es; Tel.: +34-963-877-521.

Received: 14 March 2013; in revised form: 25 March 2013 / Accepted: 25 March 2013 /

Published: 22 April 2013

---

A typo has been found in our paper [1]. It is stated on page 8698 that the range of acceptable temperature for the conservation of frescoes is 6–25 °C while in the case of RH, this range is 45%–60%, according to the Italian Standard UNI 10829 (1999). These recommended ranges of temperature (6–25 °C) and RH (45%–60%) correspond to the Standard DM 10/2001 [2], not to UNI 10829. The authors would like to apologize for any inconvenience this may have caused to the readers of this journal.

## References

1. Zarzo, M.; Fernández-Navajas, A.; García-Diego, F.-J. Long-Term Monitoring of Fresco Paintings in the Cathedral of Valencia (Spain) through Humidity and Temperature Sensors in Various Locations for Preventive Conservation. *Sensors* **2011**, *11*, 8685–8710.
2. Ministero per i Beni e le Attività Culturali. *DM 10/2001. Atto di Indirizzo sui Criteri Tecnico-scientifici e Sugli Standard di Funzionamento e Sviluppo dei Musei* (in Italian); Gazzetta Ufficiale della Repubblica Italiana, 2001; n. 244, DL 112/1998 art. 150.6.
